# Supplementary material for: Polynuclear copper(ii) pyrazolate complexes: temperature-dependent protonolysis reactions, crystal structures and high catalytic activity toward the condensation of nitriles with 2-aminoalcohol
Source: Royal Society of Chemistry journal article supplement (doi:10.1039/c3dt51970h), 2013-01-01
Supplement: c3dt51970h.pdf [file c3dt51970h.pdf]

## Electronic Supplementary Information

**Polynuclear copper(II) pyrazolate complexes: temperature-dependent protonolysis reactions, crystal structures and high catalytic activity toward the condensation of nitriles with 2-aminoalcohol**

**Ling Wang,<sup>a</sup> Bin Guo,<sup>a</sup> Hong-Xi Li,<sup>\*a</sup> Qi Li,<sup>a</sup> Hai-Yan Li,<sup>a</sup> and Jian-Ping Lang<sup>\*a,b</sup>**

<sup>a</sup> College of Chemistry, Chemical Engineering and Material Science, Soochow University, Suzhou 215123, People's Republic of China

<sup>b</sup> State Key Laboratory of Organometallic Chemistry, Shanghai Institute of Organic Chemistry, Chinese Academy of Sciences, Shanghai 210032, People's Republic of China

## Table of contents

|                                                                                                         |    |
|---------------------------------------------------------------------------------------------------------|----|
| <b>Figure S1.</b> $^1\text{H}$ NMR Spectrum of 2-(4-(1H-pyrazol-3-yl)phenyl)-4,5-dihydrooxazole.....    | S3 |
| <b>Figure S2.</b> $^{13}\text{C}$ NMR Spectrum of 2-(4-(1H-pyrazol-3-yl)phenyl)-4,5-dihydrooxazole..... | S4 |
| <b>Figure S3.</b> PXRD patterns of samples of <b>1</b> .....                                            | S5 |
| <b>Figure S4.</b> PXRD patterns of samples of <b>2</b> .....                                            | S5 |
| <b>Figure S5.</b> PXRD patterns of samples of <b>3</b> .....                                            | S6 |
| <b>Figure S6.</b> The TGA curves of complexes <b>1</b> , <b>2</b> and <b>3</b> .....                    | S6 |

**Figure S1.**  $^1\text{H}$  NMR Spectrum of 2-(4-(1H-pyrazol-3-yl)phenyl)-4,5-dihydrooxazole

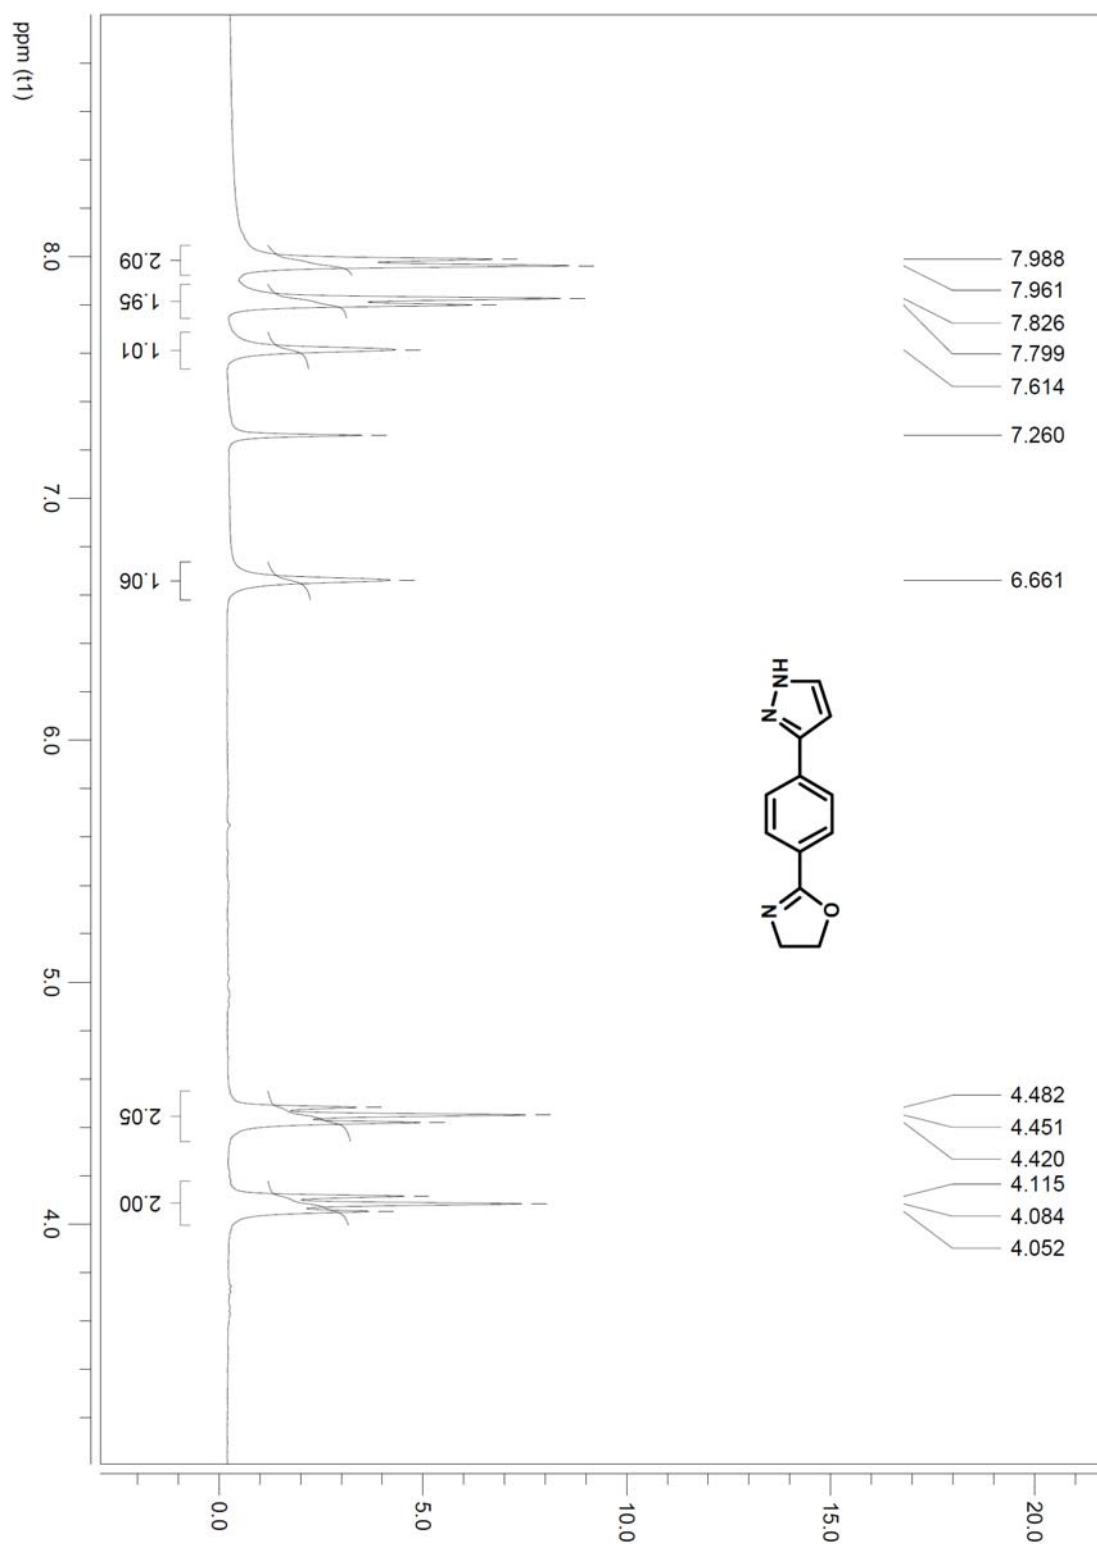

**Figure S2.**  $^{13}\text{C}$  NMR Spectrum of 2-(4-(1H-pyrazol-3-yl)phenyl)-4,5-dihydrooxazole

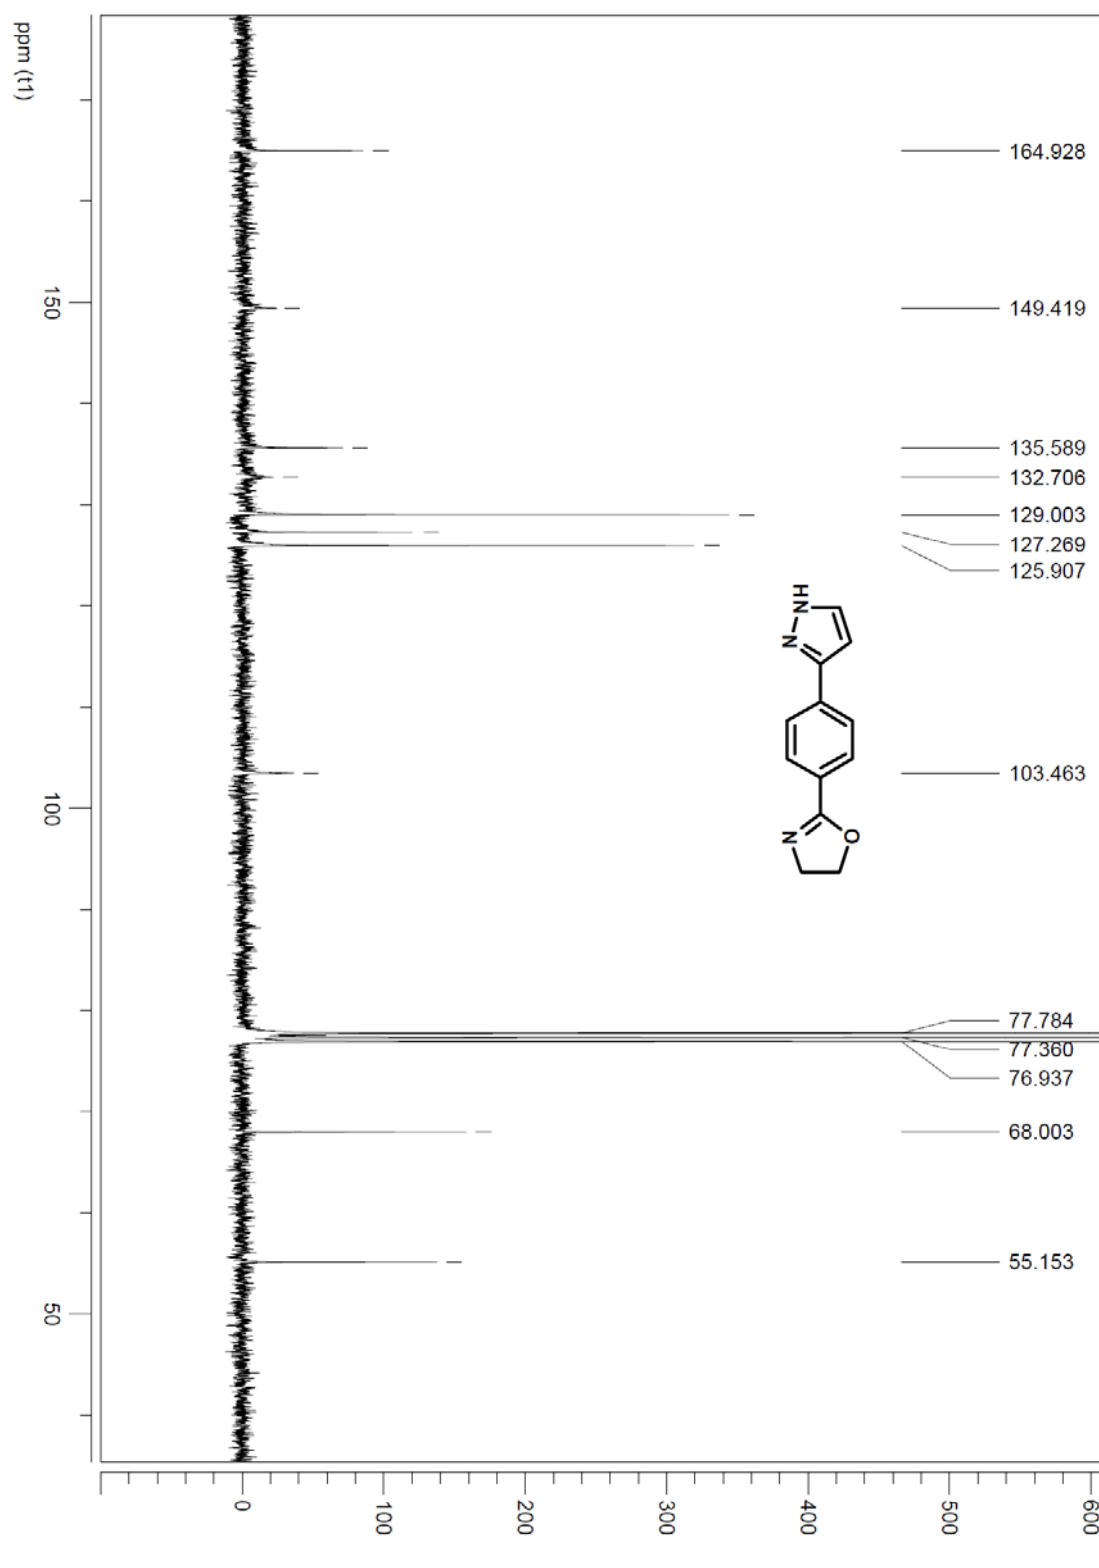

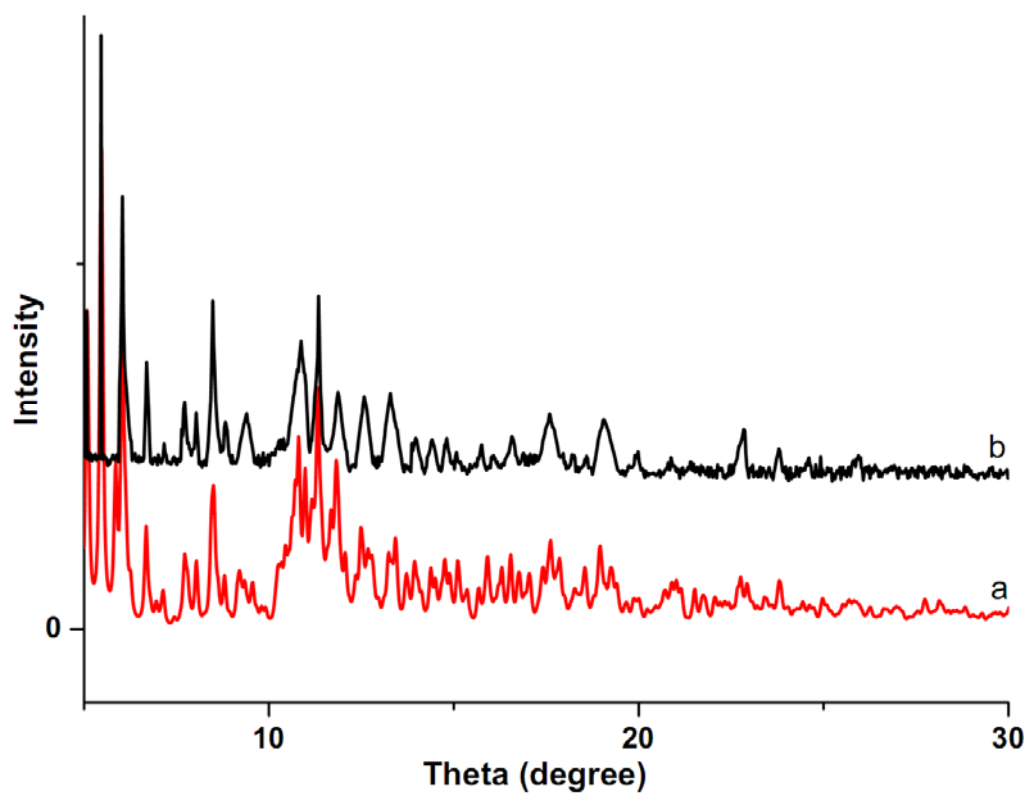

**Figure S3.** PXRD patterns for **1**. (a) simulated; (b) a single-phase polycrystalline sample of **1**

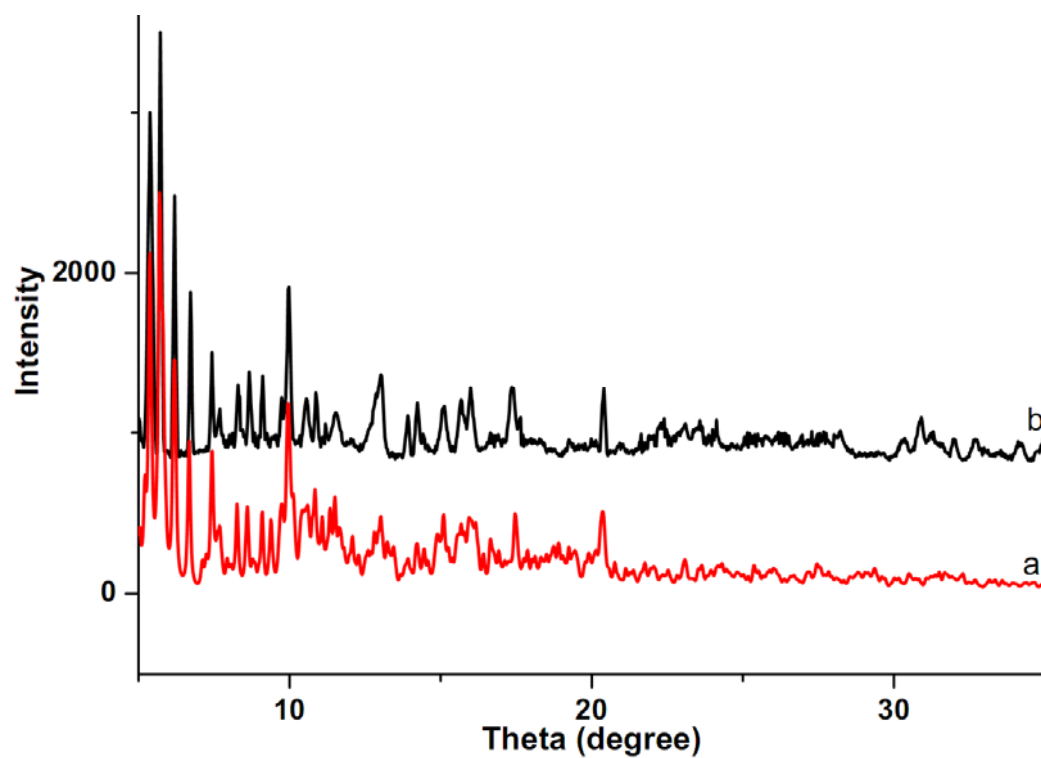

**Figure S4.** PXRD patterns for **2**. (a) simulated; (b) a single-phase polycrystalline sample of **2**

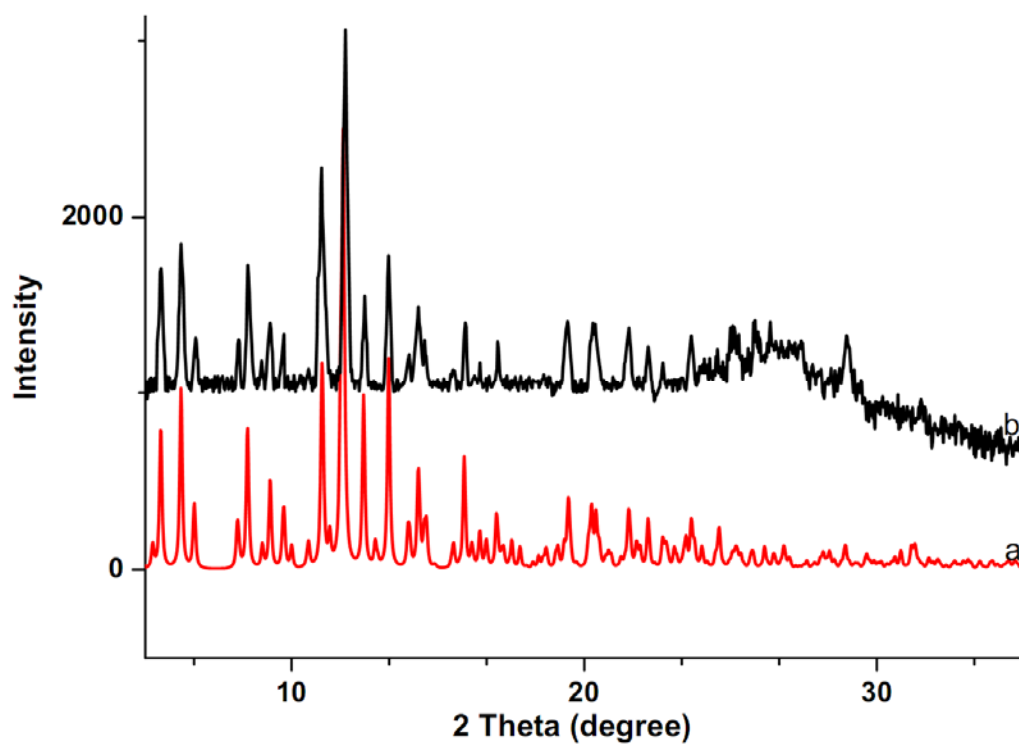

**Figure S5.** PXRD patterns for **3**. (a) simulated; (b) a single-phase polycrystalline sample of **3**

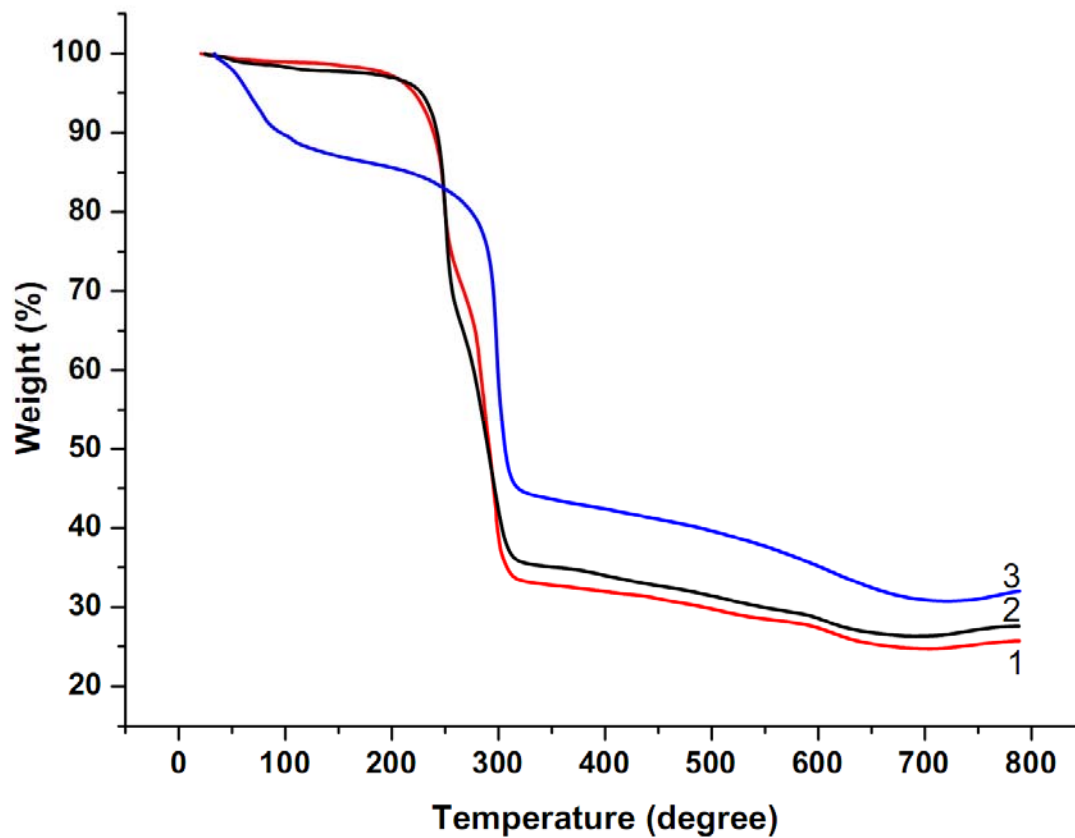

**Figure S6.** The TGA curves of complexes **1**, **2** and **3**.
